# Supplementary material for: Overexpression of N-terminal kinase like gene promotes tumorigenicity of hepatocellular carcinoma by regulating cell cycle progression and cell motility
Source: PubMed Central journal article supplement (PMC4359319; doi:10.18632/oncotarget.2730), 2015-01-10
Supplement: oncotarget-06-1618-s001.pdf [file oncotarget-06-1618-s001.pdf]

## SUPPLEMENTARY TABLES

Supplementary Table 1: The DNA sequence of PCR primers

| Name     | Primer  | Sequence                              | Note                                    |
|----------|---------|---------------------------------------|-----------------------------------------|
| NTKL     | Forward | 5'- CGGAATTCCGGGGGACGATGTGGTTCTTT -3' | Primers used for cloning NTKL           |
|          | Reverse | 5'- CGGAATTCCGACGGTTCAGTCCAGCTTCC -3' |                                         |
| RT- NTKL | Forward | 5'- GCCTGTGCTCTGCGGTCT -3'            | Primers used for QPCR                   |
|          | Reverse | 5'- GTGGCAGGAACAGGGGTG -3'            |                                         |
| RT-18s   | Forward | 5'- CTCTTAGCTGAGTGTCCCGC -3'          | Primers used for QPCR                   |
|          | Reverse | 5'- CTGATCGTCTTCGAACCTCC -3'          |                                         |
| RT-CHD1L | Forward | 5'- GGTGGAGTTGGCATGAACTT -3'          | Primers used for QPCR                   |
|          | Reverse | 5'- CACTCAACTGGAGGTCAGCA -3'          |                                         |
| GFP-NTKL | Forward | 5'- CGGGATCCCGGGGACGATGTGGTTCTTT -3'  | Primers for constructing GFP fused NTKL |
|          | Reverse | 5'- CGGAATCCGTCCAGCTCCGGGCTCCA -3'    |                                         |
| NTKL-UP1 | Forward | 5'- CTTGCCTCCGCACCTA -3'              | Primers used for Chip-PCR               |
|          | Reverse | 5'- GCACAGGGTTGGAATAAAA -3'           |                                         |
| NTKL-UP2 | Forward | 5'- ATGGCTGGAGGTGAGATA -3'            | Primers used for Chip-PCR               |
|          | Reverse | 5'- CAGAACAGGGTGATGGTG -3'            |                                         |

Supplementary Table 2: Cox proportional hazard regression analyses for 3-year survival

| Clinicopathological features | Univariable analysis |              | Multivariable analysis |              |
|------------------------------|----------------------|--------------|------------------------|--------------|
|                              | HR(95%CI)            | P            | HR (95%CI)             | P            |
| <b>NTKL expression</b>       |                      |              |                        |              |
| Without up-regulation        | 1                    |              | 1                      |              |
| With up-regulation           | 2.83(1.36–5.86)      | <b>0.005</b> | 2.47(1.08–5.68)        | <b>0.033</b> |
| <b>Differentiation</b>       |                      |              |                        |              |
| Well differentiated          | 1                    |              | 1                      |              |
| Poorly differentiated        | 3.47(1.47–8.21)      | <b>0.005</b> | 3.16(0.98–10.21)       | NS           |
| <b>Vascular invasion</b>     |                      |              |                        |              |
| Absent                       | 1                    |              |                        |              |
| Present                      | 2.79(1.44–1.5.37)    | <b>0.020</b> | 1.29(0.29–5.68)        | NS           |
| <b>Tumor number</b>          |                      |              |                        |              |
| Single                       | 1                    |              | 1                      |              |
| Multiple                     | 2.29(1.29–4.06)      | <b>0.005</b> | 2.07(0.45–9.40)        | NS           |

(Continued)

| Clinicopathological features                  | Univariable analysis |              | Multivariable analysis |              |
|-----------------------------------------------|----------------------|--------------|------------------------|--------------|
|                                               | HR(95%CI)            | <i>P</i>     | HR (95%CI)             | <i>P</i>     |
| <b>Serum AFP level</b> [ $\log_{10}$ (ng/ml)] |                      |              |                        |              |
| Low                                           | 1                    |              | 1                      |              |
| High                                          | 1.56(1.24–1.95)      | <b>0.012</b> | 1.94(1.25–3.03)        | <b>0.003</b> |
| <b>Tumor stage (TNM)</b>                      |                      |              |                        |              |
| Early                                         | 1                    |              | 1                      |              |
| Late                                          | 2.54(1.40–4.60)      | <b>0.002</b> | 1.32(0.28–6.21)        | NS           |

CI = confidence interval; HR = hazard ratio; NS = not significant.
